# Supplementary material
Source: PubMed Central journal article supplement (PMC2783384)
Supplement: NIHMS143322-supplement-Supp_Data_01.pdf [file NIHMS143322-supplement-Supp_Data_01.pdf]

**Supp. Table S1. Primers**

|                                                                                   | Exon  | PCR size |
|-----------------------------------------------------------------------------------|-------|----------|
| CC2D2A-3F : GGTTCCTGGTGAGTGGAAAG<br>CC2D2A-3R : TGGTTGGCCTAACTTCCTCA              | 3     | 285      |
| CC2D2A-4F : GCCGCACAGATTGTTAACTG<br>CC2D2A-4R : GAGCAGGCCAAAAGTTGGTA              | 4     | 357      |
| CC2D2A-4BF: CGGGGGTCCATACTTAGAGC<br>CC2D2A-4BR: CTTCCTGCCTCCCTTCTC                | 4B    | 357      |
| CC2D2A-5F : CCTCTTCCCTGGTGGGTACT<br>CC2D2A-5R : TGGCAATGCATGAAAAATAA              | 5     | 399      |
| CC2D2A-6F : GGGGGAGGGAATTGTTTTA<br>CC2D2A-7R : AAGCATTTAATACCTCCTCTGTGC           | 6-7   | 693      |
| CC2D2A-8F : GAAATTTGCCAGCATTCCAT1<br>CC2D2A-8R : CTGTCTTGGCCTCCCAAAG              | 8     | 382      |
| CC2D2A-9F: CTCATTAGCATTAAAGCCAGC<br>CC2D2A-9R: AGGGTCTAACCCAGAGCTAC               | 9     | 453      |
| CC2D2A-10F: AAAACCCACTTGTAAATATGAAAGG<br>CC2D2A-10R: TGTTTGTGTTGAAGATATTTCTTGATTG | 10    | 482      |
| CC2D2A-11F: GCACATTCATCTTTTCCTTGG<br>CC2D2A-11R: TGCAATGACTGCCCTGTTAG             | 11    | 381      |
| CC2D2A-12F: GGGGGAGGAAGTACATGAAA<br>CC2D2A-12R: GCCTGATGTTTGTCTTTATGTGT           | 12    | 399      |
| CC2D2A-13F: tggcctctaaaacctggaaa<br>CC2D2A-13R: ctggttagggcgagtgtgtg              | 13    | 674      |
| CC2D2A-14F: ctggagacagccagatgctt<br>CC2D2A-14R: cagaagcggtagctgtagca              | 14    | 489      |
| CC2D2A-15F: ggttgacatcctattgtcttaca<br>CC2D2A-15R: tttggggattgaggagaatg           | 15    | 493      |
| CC2D2A-16F: tgtgcctctgtcatctcatgt<br>CC2D2A-16R: cagagggagccacaggatac             | 16    | 468      |
| CC2D2A-17F: tgacctgcctgattacacactt<br>CC2D2A-17R: cctgatgctcgtgtaggtca            | 17    | 495      |
| CC2D2A-18F: acctgtggctcctctgggta<br>CC2D2A-18R: ctggcctcccaaagtagca               | 18    | 394      |
| CC2D2A-19F: ccacaatgagatgagccctta<br>CC2D2A-19R: ttctatggttgtctgggaagtg           | 19    | 377      |
| CC2D2A-20F: gctgtcagcatcatcacctg<br>CC2D2A-20R: tcttgaaaatactggcacctga            | 20    | 445      |
| CC2D2A-21F: tccttatgtttaatagccatcatca<br>CC2D2A-21R: tgcataaggagaagatagtgtaaagga  | 21    | 398      |
| CC2D2A-22F: ttgtttggaaaatgatttggg<br>CC2D2A-22R: tcaagaaaaagcatggaaagg            | 22    | 569      |
| CC2D2A-23F: aaagtttaggaagaaggtggaagaa<br>CC2D2A-23R: ttgaaaggtgatgatagttgtcaat    | 23    | 400      |
| CC2D2A-24F: tgcagaggaaagtaacagttgg<br>CC2D2A-24R: tggaaagtagggagggtgaga           | 24    | 473      |
| CC2D2A-25F: cagtaggatctcgccattt<br>CC2D2A-25R: aacagtagggccttggcttt               | 25    | 489      |
| CC2D2A-26F: gcagtgagctgagattgcac<br>CC2D2A-27R: cgtcaggacacctggatctt              | 26-27 | 697      |
| CC2D2A-28F: ccagcagaggggttgtctct<br>CC2D2A-28R: ttgctttgactgtggactc               | 28    | 484      |
| CC2D2A-29F: ctagggccacaaagccatta<br>CC2D2A-29R: ctcccaaagtgtgggatta               | 29    | 384      |
| CC2D2A-30 : caatgaaaagaaggcaaggaa<br>CC2D2A-30 : ggaaggctctgtttgtgtagg            | 29b   | 482      |
| CC2D2A-31F: ttocatatggctgcttacctg<br>CC2D2A-31R: ctcccaaagtgtgggatta              | 30    | 687      |
| CC2D2A-32F: aggatgtttggtgaggatgg<br>CC2D2A-32R: tggctaataatgttgcaattta            | 31    | 355      |

|                                        | Exon | PCR size |
|----------------------------------------|------|----------|
| CC2D2A-33F: gagaaaacacccatgccact       | 32   | 420      |
| CC2D2A-33R: tttcctagcaacccaaagga       |      |          |
| CC2D2A-34F: gggtgagtaagatgatgactgtcc   | 33   | 446      |
| CC2D2A-34R: tcagttatttaaagaacgacagc    |      |          |
| CC2D2A-35F: ggtacacccccaacttcaga       | 34   | 466      |
| CC2D2A-35R: gagttgagctcagatgcgttt      |      |          |
| CC2D2A-36F: cttttgggtgggtcatgggta      | 35   | 380      |
| CC2D2A-36R: ctttttgagccatgggatt        |      |          |
| CC2D2A-37F: cccagggagtagccattat        | 36   | 454      |
| CC2D2A-37R: gtacttctgggagcaacgtg       |      |          |
| CC2D2A-38F: tcttaattgcatacatttcagtagga | 37   | 372      |
| CC2D2A-38R: TGCCAATAATGTTCTTCTGATG     |      |          |

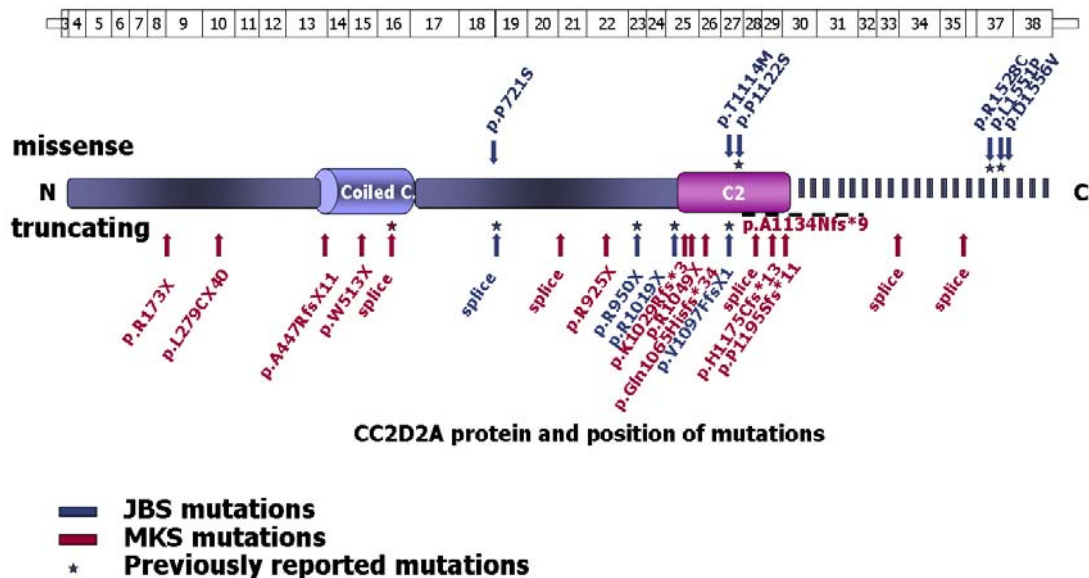

**Supp. Figure S1.** CC2D2A protein and position of mutations.

The 38 exons of *CC2D2A* gene encode a protein with predicted Coiled Coil (Coiled C) and C2 domains. Missense and truncating mutations are localised along the entire protein. All truncating mutations result in lethal Meckel syndrome (15/15). By contrast, all but two patients with JS and *CC2D2A* mutations reported here and in previous studies (Gorden et al., 2008; Noor et al., 2008) have at least one missense mutation (10/12) indicating a genotype phenotype correlation.
